# Supplementary material
Source: PubMed Central journal article supplement (PMC4644664)
Supplement: AEM.01883-15_zam999116754so1.pdf [file AEM.01883-15_zam999116754so1.pdf]

## Table S1

Table S1. Oligonucleotide primers used in gap closure

| Primers    | Sequence (5' to 3')   |
|------------|-----------------------|
| contig4EF  | CCAACTGGTCCCCTGATCC   |
| contig3SR  | CCCATTAAGCGCCGACGGAC  |
| contig3EF  | TCCGATTCCTGGTCCCTTTC  |
| contig2EF  | GCATCAACAAACCCAGAAGG  |
| contig8SR  | CGCCGACAACGCCGCTACT   |
| contig7SR  | CGCAAACCCGCACAGATAAT  |
| contig50EF | TGCGGTGGAAGTCACATTAG  |
| contig5SR  | GCTCAATCGTCACCTTCGCC  |
| contig43EF | GCAGTATCGATGTCTTGGTG  |
| contig18EF | CAGCGAGCAATAGCCAGGAT  |
| contig27SR | GCTGGAATGGGCAAAGCACG  |
| contig27EF | CGTCGTCCCGGAAGACCATA  |
| contig47EF | CGCAGATTTTCCTCAGTACC  |
| contig17EF | GATTGCCTTGGAGCTACCCG  |
| contig13EF | GCTGAAAGCCTATTTTGAAG  |
| contig26SR | CTGGAGGTATTCGGCACTAT  |
| contig26EF | CAGATTGACAGCCATAACCT  |
| contig24EF | TCGCTCACAACGGCAAGATT  |
| contig42EF | TTGCCCGTAGCCGTCAGGAG  |
| contig12EF | TTAGTGAGACATCGTCGGCG  |
| contig34SR | GCATAGTCAGCCAACCAAGG  |
| contig1EF  | ATTCCTTTACTGAGGGCATC  |
| contig11SR | GGTCAGGAGTTGATGCTTGC  |
| contig23SR | CCGGCCTCGTGCGGCTCTGC  |
| contig43SR | GAGGATGAATGACGCAACGC  |
| contig22EF | TGCAGGGCCGTAATTTTATG  |
| contig31EF | TCGTGGAACCTCTGGATGCG  |
| contig22SR | ATGGATTCCCTGTCCGGTCGC |
| contig38EF | GATTTTGACGACTTTGCCTG  |

---

|                |                                |
|----------------|--------------------------------|
| contig5EF      | AGATGGTCCATGAGGCGAGC           |
| contig29EF     | AACTCGCCACCGTCGTCCGC           |
| contig44EF     | GTCAACAACAACCAGCCCGT           |
| contig18SR     | CAAAAGTCTCGCCGTGTTCG           |
| contig42EF     | GCTTGCCCGTAGCCGTCAGG           |
| contig15SR     | CGGACGCCCGAAGCGCTGAG           |
| contig97EF     | TTTCCAGCCATCGTTCAAGC           |
| contig4F-sp3   | GCATTGCGGCTCCGNNNNNNNNNTAAGCC  |
| contig4F-sp2   | AATGAGGATGGAGGCAAGCT           |
| contig4F-sp1   | CAGCGACCGGATCGAAAAGG           |
| contig30F-sp3  | GCCGCTCGATCCTATNNNNNNNNNGACAGA |
| contig30F-sp2  | CCCGGTCCTGTTCGATTATGC          |
| contig30F-sp1  | TGGGGAGGGGGGAGCAAAAT           |
| contig15EF     | TGGCTACCATTGCTGTTGC            |
| contig15SR     | CGGCTCGCCGTAGCGGTAA            |
| contig18SR     | AGGCGACCTGGAACATCACG           |
| contig18EF     | GCAAACCACGGCAGCGAGCA           |
| contig41SR     | CTCGCAACCGTCGATATAGG           |
| contig32SR     | ACACCACGCCAAAGGTTCTC           |
| contig21SR     | GCTTCAAACCCTCGCTTCCG           |
| contig163EF    | GCCAGTCCCACCAACTTTTC           |
| contig127EF    | CCGTCCAATCTCCGCCAAGC           |
| contig127SR    | CAACCACCATTTCGAGCAG            |
| contig44EF     | CAACAACCAGCCCGTCCCCG           |
| contig21EF     | CGGGGTTTGGTCCGGATCAC           |
| contig41SR     | TCGCAACCGTCGATATAGGC           |
| contig35EF     | ACGCGAACAGATCCGCAAAC           |
| contig10EF     | GCCCGCAAGGCGTTCACTGT           |
| contig39SR     | AGGTTTCGAGCAAAATAATG           |
| contig10SR     | GCACCCGTTTTTGAAATCCT           |
| contig128EF    | GATGCTGGAGCGGGATTACC           |
| contig421EF    | GCCAAAATCGCAGCTTCGGG           |
| contig17SR     | TGGACGACGAGTGATGCCCC           |
| contig47EF-sp3 | GTACCCAGGACGGATNNNNNNNNCGATCA  |

---

---

|                |                                |
|----------------|--------------------------------|
| contig47EF-sp2 | GATGGACCGCCCAGGATTAC           |
| contig47EF-sp1 | GGGGAGGAGGTCTTTATCTT           |
| contig22SR-sp3 | AGCGCCAGCTCAAAGNNNNNNNNCCCTGT  |
| contig22SR-sp2 | CCAGCCACTCGTTGACCCAT           |
| contig22SR-sp1 | GCTTGTCAAACAGACTCATG           |
| contig11SR-sp3 | CAGGAGTTGATGCTTNNNNNNNNNCATGCC |
| contig11SR-sp2 | ACTGATTCCGTCGCTCCCGT           |
| contig11SR-sp1 | ATTGCTCCCCTGTCCTGTAT           |
| contig12SR     | TGGACGGCCCCATCGTTTTTC          |
| contig31SR     | ACTATTTACCCGGACCACCC           |
| contig6SR      | CCAGCATCCAGAGCACCGAG           |
| contig6EF      | ACCGACCAGGAAGGGCAAGG           |
| contig17SR-sp3 | TTTCGTTCAATGGAGNNNNNNNAAAGGG   |
| contig17SR-sp2 | GAAACCATTTCGGGGTCGCAT          |
| contig17SR-sp1 | CGAAACGCAAGGTGGTGGGC           |
| contig5SR-sp3  | AATCGTCACCTTCGCNNNNNNNNNTATTGG |
| contig5SR-sp2  | TTGGTGTGTGGTGGCTGGGC           |
| contig5SR-sp1  | GTTCCGTTTCACAACAGCCT           |
| contig5EF-sp3  | CTTTGGCCGATATTCNNNNNNNNNGAACAT |
| contig5EF-sp2  | AGCGACTTCTGGAAACTGCC           |
| contig5EF-sp1  | ACGCGCAGGGCCTCAACATG           |
| contig70EF     | TCATCTCGTCGGTCTCCTGT           |
| contig6EF      | ACCGACCAGGAAGGGCAAGG           |
| contig53EF     | CGATGCCCGTCACCCGAAG            |
| contig25E-sp3  | CCTGAAACAGACGGGNNNNNNNNGGCCGT  |
| contig25E-sp2  | TCGCGACCTGCGCCTGATAG           |
| contig25E-sp1  | TTGACGAGTTCGCCATAGCG           |
| contig51SR     | GACGCTCGCGACCGACCTCCT          |
| contig7EF      | CAGAGCCAGCCGCTTTCGCAC          |
| contig29SR     | ACGGACAAGCGGCACTGCAAC          |
| contig38SR     | CCGGTGACGACGATCGACTTG          |
| contig1SR      | CGACTATCAGGATGAGAACAG          |
| contig97SR     | AGGCAACAGCCCGTCACTCAG          |
| contig2SR      | CGGTACGCTGGCGGATATTCT          |

---

---

|               |                              |
|---------------|------------------------------|
| contig8EF     | CGAACGCCTGCTCCGCCTTTG        |
| contig128SR   | TGACGGAACCACCCTTTTGT         |
| contig14EF    | GATTGATTTTGGACGGCTTG         |
| contig44SR    | TCAATCCTTATGGCCGCTTC         |
| contig39EF    | AATGCGAAGGAGTGTGGGC          |
| contig32EF    | CCACGATGTGCGGCTGATGC         |
| contig51EF    | GGGTCACCGCCTCGCAGATG         |
| contig20F-sp3 | TCCCAGTCGAGCAAGNNNNNNNCGGCC  |
| contig20F-sp2 | CAGCCCCCTAGCAGGAACG          |
| contig20F-sp1 | ATGTAGCTGTAAATATATC          |
| contig20R-sp3 | CGACAAGCCAGCGATNNNNNNNCCAACA |
| contig20R-sp2 | CCCACCATACCATATCTAGT         |
| contig20R-sp1 | TTCAATCGCCGCTTCTACCC         |
| contig18F-sp3 | GTGTTCCGACAGGCGNNNNNNNATCACG |
| contig18F-sp2 | TGCCCACGCTTCCGCCGGTT         |
| contig18F-sp1 | AAGAATACTATCGATTGGGT         |
| contig18R-sp3 | TCGCAAACCACGGCANNNNNNNAGCCAG |
| contig18R-sp2 | AACGAGATTAGGGAGGGTGA         |
| contig18R-sp1 | GAGGAGGAATTGGCTTCCTC         |

---

Note: “S” represents the 5’ sequence of the contigs, “E” represents the 3’ sequence of the contigs, “F” represents the forward primer, “R” represents the reverse primer, and “sp1-sp3” represents the SEFA-PCR primer.

**Table S2**

Table S2. Results of the peptide mass of fingerprint analysis.

| Spot no. | Homologous protein                          | % Identity | Source (GenBank accession no.)              | Position              | Peptide                    | Molecular weight |
|----------|---------------------------------------------|------------|---------------------------------------------|-----------------------|----------------------------|------------------|
| A        | 3-hydroxy-2-methylbutyryl-CoA dehydrogenase | 100        | <i>Sphingomonas</i> sp. DC-6 (WP_030092748) | pMEA02<br>9382-10158  | R.IAAFDSAER.L              | 1091.56          |
|          |                                             |            |                                             |                       | K.IAIVTGAGSGLGR.S          | 1170.67          |
|          |                                             |            |                                             |                       | K.AGVMGLTLPVAR.D           | 1183.67          |
| B        | acyl-CoA dehydrogenase                      | 99         | <i>Sphingomonas</i> sp. DC-6 (WP_030092751) | pMEA02<br>12713-13861 | R.VPVENVVVGAVGCGYR.D       | 1574.78          |
|          |                                             |            |                                             |                       | R.EAYGKPIELQGVAFK.L        | 1761.96          |
|          |                                             |            |                                             |                       | R.VCSEALQVHGGAGYTR.D       | 1703.80          |
| C        | pigment production hydroxylase              | 39         | <i>Rhodococcus opacus</i> (WP_012691790)    | pMEA02                | R.VHGSLEDLETGSQALGR.V      | 1638.83          |
|          |                                             |            |                                             |                       | R.VAAITDFCANGVNEMK.G       | 1837.87          |
|          |                                             |            |                                             |                       | hypothetical protein (HP1) | 99               |

**Fig. S1**

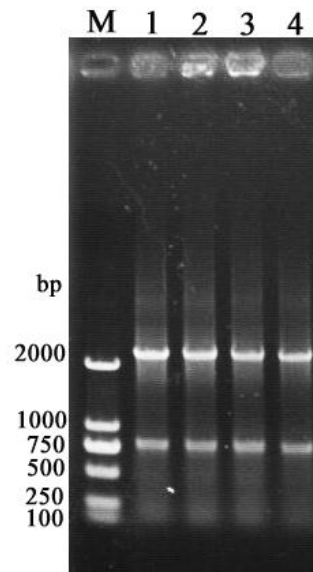

**Fig. S1** Agarose gel electrophoresis of the ERIC-PCR patterns of strains MEA3-1 and MEA3-1Mut. M, DL2000 marker; lanes 1 and 2. ERIC-PCR of strain MEA3-1; lane 3 and 4. ERIC-PCR of strain MEA3-1Mut.

**Fig. S2**

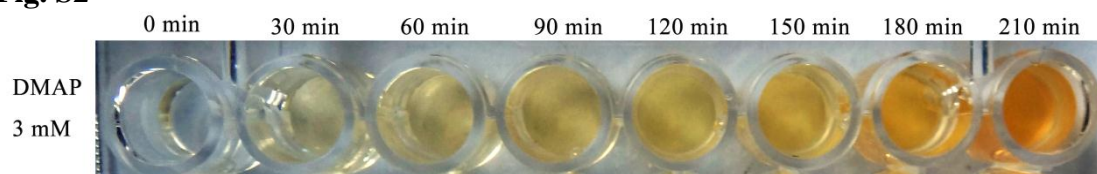

**Fig. S2** Spontaneous ammonia release of the 4-OH-DMA in the water measured using the Nessler's reagent colorimetric method.

**Fig. S3**

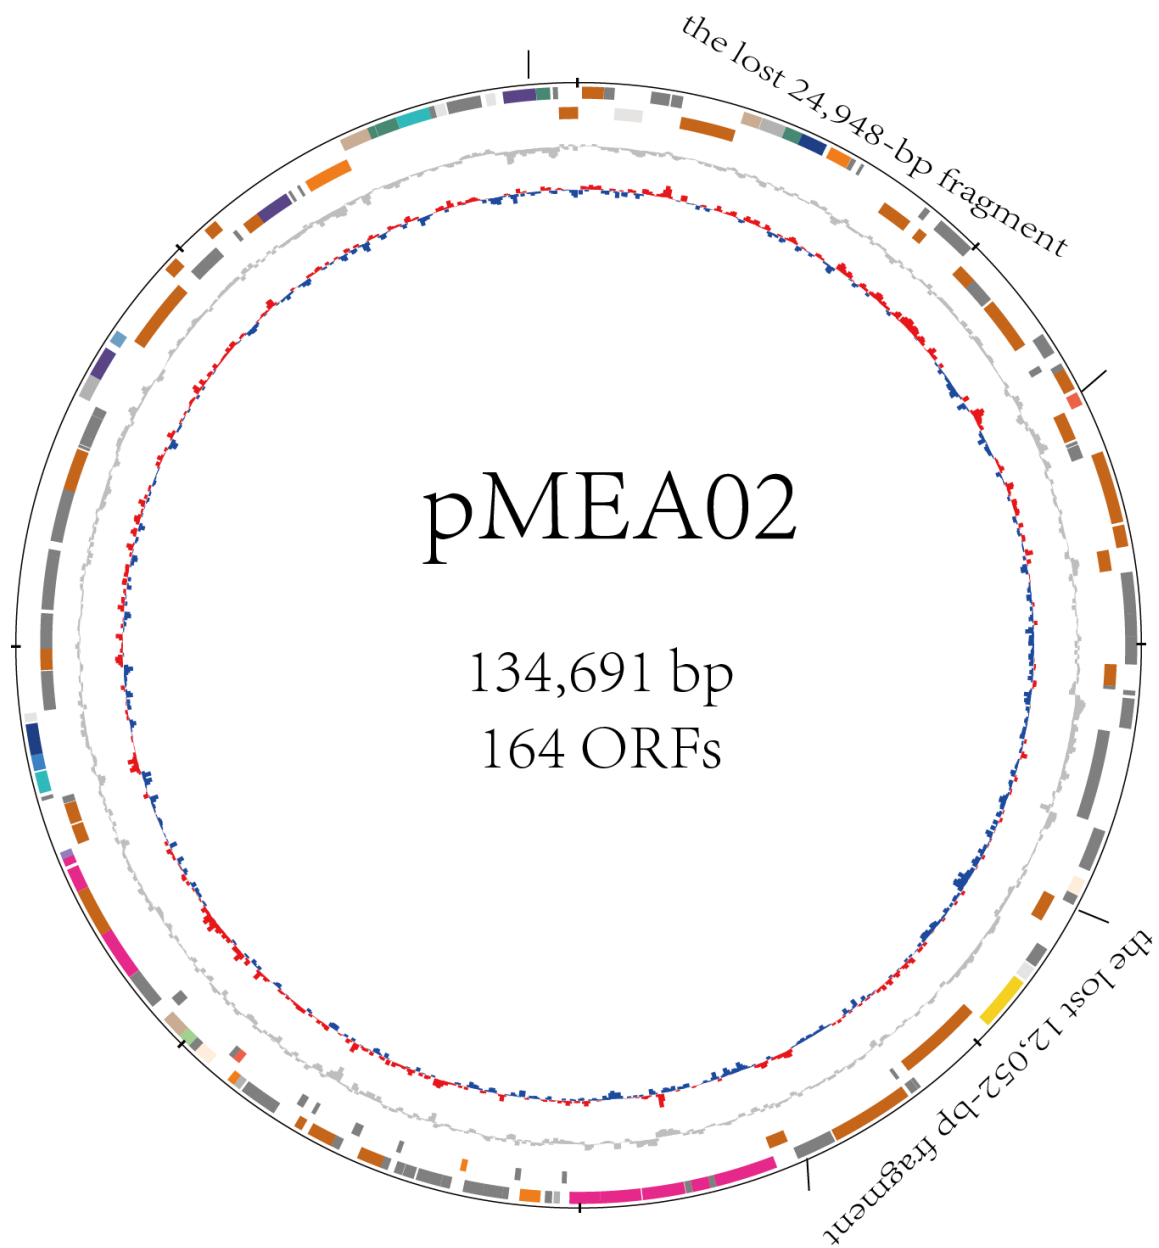

**Fig. S3** Physical map of the circular plasmid pMEA02 from strain MEA3-1. The two lost fragments are indicated in the map. The CDSs outside of the first circle are transcribed in the clockwise direction and those inside of the first circle in the counterclockwise direction, The coding regions on the plus strand are colored by functional category as follows: DNA replication, recombination and repair (dark orange3); transcription (dark orange1); cell division and chromosome partitioning



(antique white); intracellular trafficking and secretion (deep pink); energy production and conversion (royal blue); amino acid transport and metabolism (Dodger blue); lipid metabolism (cyan); inorganic ion transport and metabolism (medium purple); secondary metabolite biosynthesis, transport and catabolism (aquamarine); general function prediction (dark gray); function unknown (middle gray); and no COG (light gray). Moving toward the center, the second circle shows G+C content. The points on the outside indicate that the average GC contents of these regions are higher than that of pMEA02. The third circle shows G+C skew( $G-C/G+C$ ) in red ( $G+C$  skew  $> 0$ ) and blue ( $G+C$  skew  $< 0$ ).

**Fig. S4**

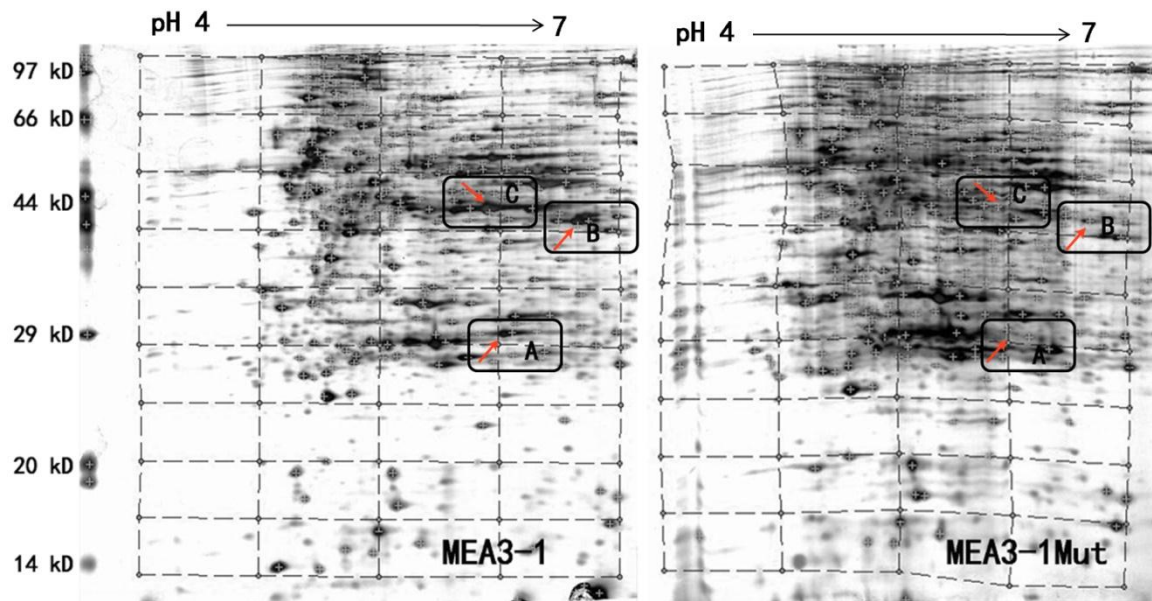

**Fig. S4** Representative 2-DE protein maps of strains MEA3-1 and MEA3-1Mut. The total protein of MEA3-1 is located on the left; the total protein of MEA3-1Mut is located on the right. Points A, B, and C were significantly different proteins between strains MEA3-1 and MEA3-1Mut.

**Fig. S5**

|         |                                                                                     |     |
|---------|-------------------------------------------------------------------------------------|-----|
| HsaA    | LQPEQWGGYQADPVLFYSAVRKIASACGSGTWVSSIIGVHNWHLALFSQQAQEDVWGNDDVRISSSYAPMGAGQVVDGG     | 120 |
| C2-hpah | FQPKVYGGLEMSLPDFANCIVTLAGACAGTAWAFSLCTHSHQIAMFSKQLQDEIWLKDPDATASSIAPFGKVEEVEGG      | 160 |
| MeaA    | FVPKIYGGYEMAPDVMAEVVKEISPYSTSAAWVLAIFYIGHNHLHALFPKQSQDEVFAPRGFSLTPGTSAPGYKLTPEVEG   | 134 |
| NcnH    | FVPVRWGGADGTFADLLAAVARVGEGETSAAWVAALAAATVPRMAAHLPRQGQAEVWSDGPDTLVLGALMPLGRAERAAGG   | 154 |
|         | * ** : : : * : * :: *                                                               |     |
| HsaA    | YTVNGAWAWSSGGDHASWAVLGGPVTKDGRPVDFVSFLIPREDYRIDVWVNVGLRGTGSNTVVVEDVFPVTHRVL SFKA    | 200 |
| C2-hpah | IILNGDYGWSSGCDHAEYAI VGFNRFDADGNKIYSFGV IPRSDYEIVDNWYAQAIKSSGSKMLKLVNFIPEYRISKAKD   | 240 |
| MeaA    | YIVKGSWNSGSSRAEWMNGG. MVENAEKPELILFMAPASDVQVIGNWVDVAGMRATSSCDIAIDGAFVPHHQCVPADV     | 213 |
| NcnH    | WRLTGTWSYVSGVDFSDWALVCARTAEDG. VEVPRYFALPREAYAIRDTEFTVGMRTGSNTLSVDDVYVPDHRVCTRAA    | 233 |
|         | * : ** : * :: * : : : ** :                                                          |     |
| HsaA    | MSNLTAPGLERN. TAPVYKMPWGTIHPTTISAPIVGMAYGAYDAHVEHQKRVRAAFAGEKAKDDPFQVRIAEASSDID     | 279 |
| C2-hpah | MMEGKSAGFGLYPDSKIFYTPYRPFYASGFSAVSLGIAERMIEAFKEKQRNRV. AYTGANVGLATPALMRIAESTHQVA    | 319 |
| MeaA    | MLEGRSPGAKLH. ANPIYSLPMVPLLQCEVLPVVGAFQGAVREFQKLTQQRVQ. SHTSEKAAEKQSAQIRLGKAL TDSA  | 291 |
| NcnH    | VLGDGCPDAPAD. . . CTRVPLKAVNGLSFAAPVLGAAGLLAEWTRWAAPRIT. . . GTGDGDPRLAENALRHGVLARA | 305 |
|         | : * ** :                                                                            |     |
| HsaA    | AAWRQLSGNVADEYALLVAGEEVPFELRLRARRDQVRATGRAISSIDKLFESSGATALANGTPLQRFWRDAHAGRVHAAN    | 359 |
| C2-hpah | AARALLEKTWEDHRIHGLNHQYPNKETLAFWRTNQAYAVKMCIEAVDRLMAAAGATSFMDNSELQRLFRDAHMTGAHAYT    | 399 |
| MeaA    | LADDMLR. NYLDLVLNMDREEIKTVEARAAIRARVAAITDFCANGVNEVMKSSASVFRNDSPLQRIFRDINMLRVHGSL    | 370 |
| NcnH    | AGEVDGAELLLDRTARAADTGALDPLLTARGGRDCALAAELLLTAADRLFRAAGTSAQVEGSPFERGWRDVSAAVSHLVL    | 385 |
|         | :: : : :: :: : : ** * *                                                             |     |

**Fig. S5** Multiple sequence alignment of the MeaA amino acid sequence and related protein sequences.

**Fig. S6**

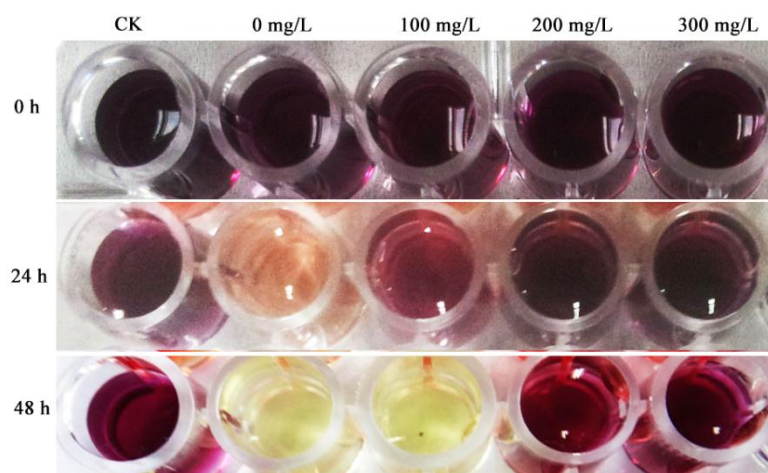

**Fig. S6** Effect of different concentrations of the cytochrome P450 inhibitor metapyrone on the degradation of MEA.
